# Supplementary material for: A Comprehensive Analysis of Bone Marrow-Derived Cytogenetic Abnormalities in Multiple Myeloma Patients with Extramedullary Disease
Source: Research Square preprint supplement (doi:10.21203/rs.3.rs-6188588/v1), 2025-04-30
Supplement: Supplementary file 1 [file 1f4cad1970ffb3ac12d3e5c2.xlsx]

## Sheet: Sheet1
supplementary Table 3. Clinical Characteristics of Patients With Primary EMD or EM-E
ID.	PMID	N	Median age (range)	Gender			DS stage				ISS stage				R-ISS stage				M protein									Occurence of EMD			Type of EMD			EMD location
				Male	Female	NA	I	II	III	NA	I	II	III	NA	I	II	III	NA	IgG	IgA	IgD	IgE	IgM	LC only	non-secretory	KAP	LAM	Pimary	Secondary	NA	only EM-B	EM-E with or w/o EM-B	NA	with CNS involvement	with sPCL
Patients with primary EMD from 15 studies
11	23368088	8	71(56~81)	4	4	0	1	1	5	1	NA	NA	NA	8	NA	NA	NA	8	0	1	0	0	2	3	0	3	3	8	0	0	4	4	0	0	0
14	25640025	40	58(26~73)	28	12	0	1	2	37	0	10	8	13	9	NA	NA	NA	40	19	6	3	0	0	7	2	20	18	40	0	0	0	40	0	5	0
17	25984534	27	60(39~78)	16	11	0	1	3	23	0	10	10	7	0	NA	NA	NA	27	16	6	0	0	0	5	0	NA	NA	27	0	0	8	19	0	4	0
19	27206246	2	34.5(30~39)	1	1	0	NA	NA	NA	2	NA	NA	NA	2	NA	NA	NA	2	2	0	0	0	0	0	0	1	1	2	0	0	0	2	0	NA	NA
20	28770558	30	NA	21	9	0	4	5	20	1	6	13	11	0	NA	NA	NA	30	20	4	0	0	0	6	0	17	13	30	0	0	NA	NA	30	NA	NA
22	31221778	267	68(60~74)	NA	NA	267	NA	NA	NA	267	119	85	38	25	38	125	17	87	NA	NA	NA	NA	NA	NA	NA	NA	NA	267	0	0	243	12	12	NA	NA
24	31288095	488	59(25~77)	287	201	0	NA	NA	NA	488	152	140	124	72	NA	NA	NA	488	231	106	NA	NA	NA	120	23	NA	NA	488	0	0	374	114	0	NA	NA
28	33686665	3	62(52~72)	NA	NA	3	NA	NA	NA	3	0	2	1	0	NA	NA	NA	3	NA	NA	NA	NA	NA	NA	NA	NA	NA	3	0	0	0	3	0	3	NA
30	34268123	10	53.5(50~69)	6	4	0	NA	NA	NA	10	NA	NA	NA	10	NA	NA	NA	10	7	2	1	0	0	0	0	7	3	10	0	0	10	0	0	0	0
32	35248783	66	64.5(26~81)	41	25	0	6	6	54	0	26	17	23	0	NA	NA	NA	66	34	11	1	0	0	19	1	31	35	66	0	0	43	23	0	0	0
33	36697375	1	52	1	0	0	NA	NA	NA	1	NA	NA	NA	1	NA	NA	NA	1	0	0	0	0	0	1	0	0	1	1	0	0	0	1	0	1	0
34	37304491	5	54(49~63)	3	2	0	0	2	3	0	0	1	4	0	0	1	4	0	3	2	0	0	0	0	0	0	5	5	0	0	0	5	0	1	0
35	37421603	95	61	NA	NA	95	NA	NA	NA	95	NA	NA	NA	95	NA	NA	NA	95	43	27	0	0	0	25	0	58	37	95	0	0	0	95	0	NA	NA
37	37568580	6	65(49~67)	5	1	0	NA	NA	NA	6	NA	NA	NA	6	NA	NA	NA	6	NA	NA	NA	NA	NA	NA	NA	NA	NA	6	0	0	0	6	0	NA	NA
39	38206369	107	63(38~89)	72	35	0	7	22	78	0	32	33	42	0	21	39	32	15	55	18	2	0	0	28	4	48	55	107	0	0	79	28	0	0	0
Total		1155	NA(25~89)	485	305	365	20	41	220	874	355	309	263	228	59	165	53	878	430	183	7	0	2	214	30	185	171	1155	0	0	761	352	42	14	0
Patients with EMD-E from all 23 studies
4	34421924	7	58(38~73)	4	3	0	NA	NA	NA	7	0	4	3	0	NA	NA	NA	7	3	0	1	0	0	3	0	5	2	0	7	0	0	7	0	NA	NA
7	39558020	5	68(58~81)	1	4	0	0	0	5	0	1	2	2	0	1	2	2	0	2	1	1	0	0	0	0	3	2	0	0	5	0	5	0	1	0
8	21932386	50	64(39~82)	24	26	0	3	12	25	10	18	13	9	10	NA	NA	NA	50	NA	NA	NA	NA	NA	NA	NA	NA	NA	18	32	0	0	50	0	50	0
10	23000906	5	56(46~70)	3	2	0	NA	NA	NA	5	NA	NA	NA	5	NA	NA	NA	5	NA	NA	NA	NA	NA	NA	1	2	2	0	5	0	0	5	0	0	0
11	23368088	18	60.5(41~81)	12	5	1	0	0	16	2	NA	NA	NA	18	NA	NA	NA	18	9	3	2	0	2	1	0	11	6	4	14	0	0	18	0	1	1
12	24395149	36	58.6(31~78)	23	13	0	NA	NA	NA	36	3	15	18	0	NA	NA	NA	36	15	6	0	0	0	15	0	NA	NA	20	16	0	0	36	0	36	0
13	24526137	11	59(NA)	9	2	0	NA	NA	NA	11	NA	NA	NA	11	NA	NA	NA	11	5	6	0	0	0	0	0	NA	NA	3	8	0	0	11	0	1	0
14	25640025	40	58(26~73)	28	12	0	1	2	37	0	10	8	13	9	NA	NA	NA	40	19	6	3	0	0	7	2	20	18	40	0	0	0	40	0	5	0
16	25833301	55	52(34~66)	35	20	0	NA	NA	NA	55	NA	NA	NA	55	NA	NA	NA	55	NA	NA	NA	NA	NA	NA	NA	NA	NA	13	42	0	0	55	0	3	0
17	25984534	14	58(39~78)	11	3	0	0	0	14	0	4	5	5	0	NA	NA	NA	14	5	6	0	0	1	2	0	NA	NA	0	14	0	0	14	0	4	0
19	27206246	14	50.5(30~69)	9	5	0	NA	NA	NA	14	NA	NA	NA	14	NA	NA	NA	14	9	2	0	0	0	3	0	7	4	2	12	0	0	14	0	NA	NA
25	31334859	127	63(27~94)	76	51	0	NA	NA	NA	127	35	31	51	10	NA	NA	NA	127	59	31	1	0	0	29	7	69	50	20	107	0	0	127	0	14	5
27	32191818	8	56(31~65)	4	4	0	NA	NA	NA	8	4	3	1	0	NA	NA	NA	8	2	3	1	0	0	1	1	2	4	NA	NA	8	0	8	0	0	1
28	33686665	13	62(52~72)	NA	NA	13	NA	NA	NA	13	0	6	4	3	NA	NA	NA	13	NA	NA	NA	NA	NA	NA	NA	NA	NA	3	10	0	0	13	0	13	NA
29	33792474	43	57(47.5~65)	25	18	0	NA	NA	NA	43	9	9	21	4	NA	NA	NA	43	23	5	2	0	0	13	0	NA	NA	NA	NA	43	0	43	0	10	2
30	34268123	4	63(44~66)	3	1	0	NA	NA	NA	4	NA	NA	NA	4	NA	NA	NA	4	2	1	0	0	0	1	0	2	2	0	4	0	0	4	0	0	0
32	35248783	23	67(32~80)	14	9	0	NA	NA	NA	23	9	4	10	0	NA	NA	NA	23	NA	NA	NA	NA	NA	NA	NA	NA	NA	23	0	0	0	23	0	0	0
33	36697375	8	71(46~84)	7	1	0	NA	NA	NA	8	NA	NA	NA	8	NA	NA	NA	8	4	1	1	0	0	2	0	6	2	1	7	0	0	8	0	3	0
34	37304491	5	54(49~63)	3	2	0	0	2	3	0	0	1	4	0	0	1	4	0	3	2	0	0	0	0	0	0	5	5	0	0	0	5	0	1	0
35	37421603	299	59.7(18-89.3)	NA	NA	299	NA	NA	NA	299	104	62	65	68	61	74	76	88	152	72	4	0	0	70	1	182	117	95	204	0	0	299	0	NA	NA
36	37479009	14	55.07(43~75)	9	5	0	0		14	0	2		12	0	6		7	1	4	4	2	0	0	4	0	NA	NA	0	14	0	0	14	0	NA	NA
37	37568580	9	65(49~72)	6	3	0	NA	NA	NA	9	NA	NA	NA	9	NA	NA	NA	9	NA	NA	NA	NA	NA	NA	NA	NA	NA	6	3	0	0	9	0	NA	NA
38	37941401	22	67(47~76)	13	9	0	NA	NA	NA	22	6	6	10	0	NA	NA	NA	22	6	7	0	0	0	9	0	10	12	3	19	0	0	22	0	NA	2
Total		830	NA(26~94)	319	198	313	20		114	696	371		228	228	142		89	596	322	156	18	0	3	160	12	319	226	256	518	56	0	830	0	142	11
