# Supplementary material for: A Comprehensive Analysis of Bone Marrow-Derived Cytogenetic Abnormalities in Multiple Myeloma Patients with Extramedullary Disease
Source: Research Square preprint supplement (doi:10.21203/rs.3.rs-6188588/v1), 2025-04-30
Supplement: Supplementary file 2 [file 566672bafbb5e6c220985460.xlsx]

## Sheet: Sheet1
Supplementary Table 7. Clinical and Cytogenetic Characteristics of Patients With Primary EMD vs. Without EMD From 6 Comparative Studies
ID	PMID	N	Cytogenetics available		Hyperdiploidy			t(4;14)			t(14;16)			t(14;20)			t(11;14)			del(17p)/del p53			1q21+			del RB1/del13q			Median age (range)	Gender			DS stage				ISS stage				R-ISS stage				M protein
			n	%	n	available	%	n	available	%	n	avilable	%	n	avilable	%	n	avilable	%	n	avilable	%	n	avilable	%	n	avilable	%		Male	Female	NA	I	II	III	NA	I	II	III	NA	I	II	III	NA	IgG	IgA	IgD	IgE	IgM
Patients with primary EMD
14	25640025	40	19	47.5	NA	NA	NA	7	31	22.5806	2	26	7.69231	NA	NA	NA	4	28	14.2857	10	29	34.4828	14	26	53.8462	17	29	58.6207	58(26-73)	28	12	0	1	2	37	0	10	8	13	9	NA	NA	NA	40	19	6	3	0	0
17	25984534	27	21	77.7778	NA	NA	NA	4	21	19.0476	0	21	0	NA	NA	NA	0	21	0	6	21	28.5714	12	21	57.1429	12	21	57.1429	60(39-78)	16	11	0	1	3	23	0	10	10	7	0	NA	NA	NA	27	16	6	0	0	0
20	28770558	30	26	86.6667	NA	NA	NA	5	27	18.5185	0	NA	NA	NA	NA	NA	6	24	25	9	25	36	NA	NA	NA	19	25	76	NA	21	9	0	4	5	20	1	6	13	11	0	NA	NA	NA	30	20	4	0	0	0
22	31221778	267	166	62.1723	NA	NA	NA	22	166	13.253	6	166	3.61446	NA	NA	NA	NA	NA	NA	32	166	19.2771	NA	NA	NA	NA	NA	NA	68(60-74)	NA	NA	267	0	0	0	267	119	85	38	25	38	125	17	87	NA	NA	NA	NA	NA
32	35248783	66	66	100	NA	NA	NA	5	66	7.57576	3	66	4.54545	NA	NA	NA	4	66	6.06061	6	66	9.09091	15	66	22.7273	15	66	22.7273	64.5(26~81)	41	25	0	6	6	54	0	26	17	23	0	0	0	0	66	34	11	1	0	0
37	37568580	6	6	100	NA	NA	NA	1	6	16.6667	1	6	16.6667	NA	NA	NA	0	6	0	0	6	0	3	6	50	1	6	16.6667	65(49~67)	5	1	0	NA	NA	NA	6	NA	NA	NA	6	NA	NA	NA	6	NA	NA	NA	NA	NA
Total		436	304	69.7248	NA	NA	NA	44	317	13.8801	12	285	4.21053	NA	NA	NA	14	145	9.65517	63	313	20.1278	44	119	36.9748	64	147	43.5374	NA(26~81)	111	58	267	12	16	134	274	171	133	92	40	38	125	17	256	89	27	4	0	0
%																														25.4587	13.3028	61.2385	2.75229	3.66972	30.7339	62.844	39.2202	30.5046	21.1009	9.17431	8.7156	28.6697	3.89908	58.7156	20.4128	6.19266	0.917431	0	0
Patients without EMD
14	25640025	794	368	46.3476	NA	NA	NA	70	298	23.4899	8	222	3.6036	NA	NA	NA	54	228	23.6842	29	243	11.9342	110	212	51.8868	118	241	48.9627	58(26-86)	502	292	0	45	83	666	0	106	216	251	221	NA	NA	NA	794	374	191	20	0	4
17	25984534	259	134	51.7375	NA	NA	NA	16	134	11.9403	5	134	3.73134	NA	NA	NA	28	134	20.8955	17	134	12.6866	43	134	32.0896	60	134	44.7761	NA	NA	NA	259	NA	NA	NA	259	NA	NA	NA	259	NA	NA	NA	259	NA	NA	NA	NA	NA
20	28770558	47	46	97.8723	NA	NA	NA	10	44	22.7273	1	17	5.88235	NA	NA	NA	11	41	26.8293	2	34	5.88235	NA	NA	NA	26	40	65	NA	21	26	0	2	13	31	1	6	25	15	1	NA	NA	NA	47	27	12	1	0	1
22	31221778	2065	1528	73.9952	NA	NA	NA	219	1528	14.3325	69	1528	4.51571	NA	NA	NA	NA	NA	NA	220	1528	14.3979	NA	NA	NA	NA	NA	NA	69(61~74)	NA	NA	2065	0	0	0	2065	682	782	509	92	294	1132	173	466	NA	NA	NA	NA	NA
32	35248783	160	160	100	NA	NA	NA	4	160	2.5	2	160	1.25	NA	NA	NA	11	160	6.875	9	160	5.625	22	160	13.75	39	160	24.375	60(32~85)	103	57	0	15	20	125	0	51	34	75	0	0	0	0	160	63	36	4	0	0
37	37568580	5	5	100	NA	NA	NA	1	5	20	0	5	0	NA	NA	NA	1	5	20	2	5	40	1	5	20	1	5	20	65(49~65)	5	0	0	NA	NA	NA	5	NA	NA	NA	5	NA	NA	NA	5	NA	NA	NA	NA	NA
Total		3330	2241	67.2973	NA	NA	NA	320	2169	14.7533	85	2066	4.11423	NA	NA	NA	105	568	18.4859	279	2104	13.2605	176	511	34.4423	244	580	42.069	NA(26~86)	631	375	2324	62	116	822	2330	845	1057	850	578	294	1132	173	1731	464	239	25	0	5
%																														18.9489	11.2613	69.7898	1.86186	3.48348	24.6847	69.97	25.3754	31.7417	25.5255	17.3574	8.82883	33.994	5.1952	51.982	13.9339	7.17718	0.750751	0	0.15015
[truncated: 7 more columns]
