# Supplementary material for: A Comprehensive Analysis of Bone Marrow-Derived Cytogenetic Abnormalities in Multiple Myeloma Patients with Extramedullary Disease
Source: Research Square preprint supplement (doi:10.21203/rs.3.rs-6188588/v1), 2025-04-30
Supplement: Supplementary file 3 [file 5934f8b8bf09d3cd395f04a1.xlsx]

## Sheet: Sheet1
supplementary Table 5. Cytogenetic Characteristics of Patients With Primary EMD or EM-E
ID.	PMID	N	Cytogenetics available		Hyperdiploidy			t(4;14)			t(14;16)			t(14;20)			t(11;14)			del(17p)/del p53			1q21+			del RB1/del13q
			n	%	n	available	%	n	available	%	n	available	%	n	available	%	n	available	%	n	available	%	n	available	%	n	available	%
Patients with primary EMD from 15 studies
11	23368088	8	4	50	1	4	25	0	4	0	0	4	0	0	4	0	0	4	0	1	4	25	0	4	0	1	4	25
14	25640025	40	31	77.5	NA	NA	NA	7	31	22.5806	2	26	7.69231	NA	NA	NA	4	28	14.2857	10	29	34.4828	14	26	53.8462	17	29	58.6207
17	25984534	27	21	77.7778	NA	NA	NA	4	21	19.0476	0	21	0	NA	NA	NA	0	21	0	6	21	28.5714	12	21	57.1429	12	21	57.1429
19	27206246	2	1	50	1	1	100	NA	1	NA	NA	NA	NA	NA	NA	NA	NA	NA	NA	NA	NA	NA	0	1	0	0	1	0
20	28770558	30	27	90	NA	NA	NA	5	27	18.5185	0	NA	NA	NA	NA	NA	6	24	25	9	25	36	NA	NA	NA	19	25	76
22	31221778	267	166	62.1723	NA	NA	NA	22	166	13.253	6	166	3.61446	NA	NA	NA	NA	NA	NA	32	166	19.2771	NA	NA	NA	NA	NA	NA
24	31288095	488	488	100	NA	NA	NA	90	488	18.4426	13	488	2.66393	6	488	1.22951	NA	NA	NA	81	488	16.5984	50	488	10.2459	NA	NA	NA
28	33686665	3	2	66.6667	NA	NA	NA	0	2	0	0	2	0	0	2	0	0	2	0	0	2	0	0	2	0	0	2	0
30	34268123	10	6	60	NA	NA	NA	NA	NA	NA	NA	NA	NA	NA	NA	NA	NA	NA	NA	0	6	0	1	6	16.6667	3	6	50
32	35248783	66	66	100	NA	NA	NA	5	66	7.57576	3	66	4.54545	NA	NA	NA	4	66	6.06061	6	66	9.09091	15	66	22.7273	15	66	22.7273
33	36697375	1	1	100	0	1	0	0	1	0	0	1	0	0	1	0	1	1	100	0	1	0	0	1	0	0	1	0
34	37304491	5	5	100	NA	NA	NA	2	5	40	0	5	0	0	5	0	0	5	0	2	5	40	0	5	0	0	5	0
35	37421603	95	95	100	20	95	21.0526	14	95	14.7368	8	95	8.42105	6	95	6.31579	7	95	7.36842	17	95	17.8947	25	95	26.3158	29	95	30.5263
37	37568580	6	6	100	NA	NA	NA	1	6	16.6667	1	6	16.6667	NA	NA	NA	0	6	0	0	6	0	3	6	50	1	6	16.6667
39	38206369	107	92	85.9813	NA	NA	NA	8	92	8.69565	6	92	6.52174	NA	NA	NA	12	92	13.0435	10	92	10.8696	22	92	23.913	18	92	19.5652
Total		1155	1011	87.5325	22	101	21.7822	158	1005	15.7214	39	972	4.01235	12	595	2.01681	34	344	9.88372	174	1006	17.2962	142	813	17.4662	115	353	32.5779
Patients with EMD-E from all 23 studies
4	34421924	7	7	100	NA	NA	NA	2	20	10	2	7	28.5714	NA	NA	NA	NA	NA	NA	2	7	28.5714	NA	NA	NA	NA	NA	NA
7	39558020	5	5	100	0	5	0	0	5	0	0	5	0	0	5	0	0	5	0	1	5	20	2	5	40	0	5	0
8	21932386	50	19	38	NA	NA	NA	2	19	10.5263	NA	NA	NA	NA	NA	NA	2	19	10.5263	1	19	5.26316	NA	NA	NA	NA	NA	NA
10	23000906	5	5	100	3	5	60	0	5	0	2	5	40	NA	NA	NA	0	5	0	1	5	20	NA	NA	NA	3	5	60
11	23368088	18	12	66.6667	0	12	0	0	12	0	0	12	0	0	12	0	1	12	8.33333	2	12	16.6667	0	12	0	4	12	33.3333
12	24395149	36	8	22.2222	0	8	0	0	8	0	0	8	0	0	8	0	0	8	0	0	8	0	0	8	0	1	8	12.5
13	24526137	11	11	100	2	11	18.1818	1	11	9.09091	NA	NA	NA	NA	NA	NA	NA	NA	NA	1	11	9.09091	2	11	18.1818	9	11	81.8182
14	25640025	40	19	47.5	NA	NA	NA	7	31	22.5806	2	26	7.69231	NA	NA	NA	4	28	14.2857	10	29	34.4828	14	26	53.8462	17	29	58.6207
16	25833301	55	29	52.7273	NA	NA	NA	NA	NA	NA	NA	NA	NA	NA	NA	NA	2	29	6.89655	1	29	3.44828	1	29	3.44828	9	29	31.0345
17	25984534	14	8	57.1429	NA	NA	NA	0	8	0	0	8	0	NA	NA	NA	0	8	0	3	8	37.5	4	8	50	4	8	50
19	27206246	14	9	64.2857	4	7	57.1429	NA	NA	NA	NA	NA	NA	NA	NA	NA	NA	NA	NA	NA	NA	NA	3	8	37.5	1	8	12.5
25	31334859	127	88	69.2913	NA	NA	NA	17	88	19.3182	2	88	2.27273	0	88	0	6	88	6.81818	10	88	11.3636	NA	NA	NA	28	88	31.8182
27	32191818	8	7	87.5	NA	NA	NA	1	17	5.88235	NA	NA	NA	NA	NA	NA	NA	NA	NA	1	7	14.2857	7	7	100	4	7	57.1429
28	33686665	13	11	84.6154	NA	NA	NA	3	11	27.2727	1	11	9.09091	1	11	9.09091	0	11	0	1	11	9.09091	2	11	18.1818	0	11	0
29	33792474	43	33	76.7442	NA	NA	NA	4	33	12.1212	NA	NA	NA	NA	NA	NA	3	33	9.09091	7	33	21.2121	NA	NA	NA	NA	NA	NA
30	34268123	4	2	50	NA	NA	NA	NA	NA	NA	NA	NA	NA	NA	NA	NA	NA	NA	NA	0	2	0	2	2	100	1	8	12.5
32	35248783	23	23	100	NA	NA	NA	1	23	4.34783	2	23	8.69565	NA	NA	NA	1	23	4.34783	3	23	13.0435	8	23	34.7826	5	23	21.7391
33	36697375	8	8	100	4	8	50	0	8	0	0	8	0	0	8	0	2	8	25	1	8	12.5	0	8	0	1	8	12.5
34	37304491	5	5	100	NA	NA	NA	2	5	40	0	5	0	0	5	0	0	5	0	2	5	40	0	5	0	0	5	0
35	37421603	299	236	78.9298	57	236	24.1525	38	236	16.1017	19	236	8.05085	5	236	2.11864	31	236	13.1356	38	236	16.1017	71	236	30.0847	69	236	29.2373
36	37479009	14	12	85.7143	NA	NA	NA	2	12	16.6667	NA	NA	NA	NA	NA	NA	0	12	0	5	12	41.6667	7	12	58.3333	NA	NA	NA
37	37568580	9	9	100	NA	NA	NA	1	9	11.1111	2	9	22.2222	NA	NA	NA	1	9	11.1111	1	9	11.1111	5	9	55.5556	1	9	11.1111
38	37941401	22	18	81.8182	NA	NA	NA	2	18	11.1111	1	18	5.55556	1	18	5.55556	2	18	11.1111	2	18	11.1111	13	18	72.2222	10	18	55.5556
Total		830	584	70.3614	70	292	23.9726	83	579	14.3351	33	469	7.03625	7	391	1.79028	55	557	9.87433	93	585	15.8974	141	438	32.1918	167	528	31.6288
