# Supplementary material for: A Comprehensive Analysis of Bone Marrow-Derived Cytogenetic Abnormalities in Multiple Myeloma Patients with Extramedullary Disease
Source: Research Square preprint supplement (doi:10.21203/rs.3.rs-6188588/v1), 2025-04-30
Supplement: Supplementary file 4 [file 70eee989dbcce3756547cb89.xlsx]

## Sheet: Sheet1
Supplementary Table 6. Clinical and Cytogenetic Characteristics of Patients With and Without EMD From 15 Comparative Studies
ID	PMID	N	Cytogenetics		Hyperdiploidy			t(4;14)			t(14;16)			t(14;20)			t(11;14)			del(17p)/del p53			1q21+			del RB1/del13q			Median age (range)	Gender			DS stage				ISS stage				R-ISS stage				M protein
			n	%	n	available	%	n	available	%	n	available	%	n	available	%	n	available	%	n	available	%	n	available	%	n	available	%		Male	Female	NA	I	II	III	NA	I	II	III	NA	I	II	III	NA	IgG	IgA	IgD	IgE	IgM
Patients with EMD
1	24038024	55	13	23.6364	0	4	0	4	12	33.3333	NA	NA	NA	NA	NA	NA	NA	NA	NA	2	6	33.3333	5	9	55.5556	7	13	53.8462	NA	NA	NA	55	NA	NA	NA	55	NA	NA	NA	55	NA	NA	NA	55	NA	NA	NA	NA	NA
2	33512480	5	5	100	NA	NA	NA	2	5	40	0	5	0	NA	NA	NA	NA	NA	NA	1	5	20	NA	NA	NA	NA	NA	NA	54(38~62)	2	3	0	0	0	5	0	2	3	0	0	NA	NA	NA	5	3	0	0	0	0
3	34314018	22	22	100	NA	NA	NA	0	22	0	0	22	0	NA	NA	NA	NA	NA	NA	3	22	13.6364	3	22	13.6364	NA	NA	NA	58.5(40~73)	13	9	0	NA	NA	NA	22	3	6	13	0	NA	NA	NA	22	NA	NA	NA	NA	NA
4	34421924	7	7	100	NA	NA	NA	2	20	10	2	7	28.5714	NA	NA	NA	NA	NA	NA	2	7	28.5714	NA	NA	NA	NA	NA	NA	58(38~73)	4	3	0	NA	NA	NA	7	0	4	3	0	NA	NA	NA	7	3	0	1	0	0
5	34980210	8	8	100	NA	NA	NA	NA	NA	NA	NA	NA	NA	NA	NA	NA	NA	NA	NA	1	8	12.5	6	8	75	0	8	0	60(48~78)	NA	NA	8	NA	NA	NA	8	0	1	7	0	NA	NA	NA	8	4	3	0	0	0
8	21932386	50	19	38	NA	NA	NA	2	19	10.5263	NA	NA	NA	NA	NA	NA	2	19	10.5263	1	19	5.26316	NA	NA	NA	NA	NA	NA	64(39~82)	24	26	0	3	12	25	10	18	13	9	10	NA	NA	NA	50	NA	NA	NA	NA	NA
13	24526137	11	11	100	2	11	18.1818	1	11	9.09091	NA	NA	NA	NA	NA	NA	NA	NA	NA	1	11	9.09091	2	11	18.1818	9	11	81.8182	59(NA)	9	2	0	NA	NA	NA	11	NA	NA	NA	11	NA	NA	NA	11	5	6	0	0	0
14	25640025	40	19	47.5	NA	NA	NA	7	31	22.5806	2	26	7.69231	NA	NA	NA	4	28	14.2857	10	29	34.4828	14	26	53.8462	17	29	58.6207	58(26~73)	28	12	0	1	2	37	0	10	8	13	9	NA	NA	NA	40	19	6	3	0	0
17	25984534	41	29	70.7317	NA	NA	NA	4	29	13.7931	0	29	0	NA	NA	NA	0	29	0	9	29	31.0345	16	29	55.1724	16	29	55.1724	58(39~78)	27	14	0	1	3	37	0	14	15	12	0	NA	NA	NA	41	21	12	0	0	1
20	28770558	44	40	90.9091	NA	NA	NA	8	41	19.5122	1	18	5.55556	NA	NA	NA	8	37	21.6216	14	35	40	NA	NA	NA	27	36	75	NA	29	15	0	5	7	27	5	9	19	13	3	NA	NA	NA	44	29	6	0	0	1
22	31221778	267	166	62.1723	NA	NA	NA	22	166	13.253	6	166	3.61446	NA	NA	NA	NA	NA	NA	32	166	19.2771	NA	NA	NA	NA	NA	NA	68(60~74)	NA	NA	267	NA	NA	NA	267	119	85	38	25	38	125	17	87	NA	NA	NA	NA	NA
31	34726261	234	59	25.2137	12	41	29.2683	15	47	31.9149	0	30	0	NA	NA	NA	6	32	18.75	3	42	7.14286	35	49	71.4286	43	55	78.1818	NA	133	101	0	23	45	162	4	81	67	57	29	NA	NA	NA	234	123	65	NA	NA	NA
32	35248783	66	66	100	NA	NA	NA	5	66	7.57576	3	66	4.54545	NA	NA	NA	4	66	6.06061	6	66	9.09091	15	66	22.7273	15	66	22.7273	64.5(26~81)	41	25	0	6	6	54	0	26	17	23	0	NA	NA	NA	66	34	11	1	0	0
37	37568580	9	9	100	NA	NA	NA	1	9	11.1111	2	9	22.2222	NA	NA	NA	1	9	11.1111	1	9	11.1111	5	9	55.5556	1	9	11.1111	65(49~72)	6	3	0	NA	NA	NA	9	NA	NA	NA	9	NA	NA	NA	9	NA	NA	NA	NA	NA
41	38845015	84	73	86.9048	NA	NA	NA	5	73	7	1	73	1.4	NA	NA	NA	NA	NA	NA	16	73	21.9178	34	73	46.5753	NA	NA	NA	62 (55–69)	46	38	0	NA	NA	NA	84	NA	NA	NA	84	NA	NA	11	73	NA	NA	NA	NA	NA
Total		943	546	57.9003	14	56	25	78	551	14.1561	17	451	3.7694	NA	NA	NA	25	220	11.3636	102	527	19.3548	135	302	44.702	135	256	52.7344	NA(26~82)	362	251	330	39	75	347	482	282	238	188	235	38	125	28	752	241	109	5	0	2
%																														38.3881	26.6172	34.9947	4.13574	7.95334	36.7975	51.1135	29.9046	25.2386	19.9364	24.9205	4.02969	13.2556	2.96925	79.7455	25.5567	11.5589	0.530223	0	0.212089
Patients without EMD
1	24038024	171	38	22.2222	5	14	35.7143	8	26	30.7692	NA	NA	NA	NA	NA	NA	NA	NA	NA	2	25	8	14	28	50	23	37	62.1622	NA	NA	NA	171	NA	NA	NA	171	NA	NA	NA	171	NA	NA	NA	171	NA	NA	NA	NA	NA
2	33512480	13	13	100	NA	NA	NA	1	13	7.69231	0	13	0	NA	NA	NA	NA	NA	NA	3	13	23.0769	NA	NA	NA	NA	NA	NA	53(41~66)	8	5	0	0	1	12	0	8	5	0	0	NA	NA	NA	13	5	1	1	0	0
3	34314018	75	75	100	NA	NA	NA	11	75	14.6667	7	75	9.33333	NA	NA	NA	NA	NA	NA	13	75	17.3333	22	75	29.3333	NA	NA	NA	NA	38	37	0	NA	NA	NA	75	18	27	29	1	NA	NA	NA	75	NA	NA	NA	NA	NA
4	34421924	13	13	100	NA	NA	NA	1	21	4.7619	5	13	38.4615	NA	NA	NA	NA	NA	NA	2	13	15.3846	NA	NA	NA	NA	NA	NA	58(42~77)	8	5	0	NA	NA	NA	13	1	6	6	0	NA	NA	NA	13	8	2	1	0	0
5	34980210	8	8	100	NA	NA	NA	NA	NA	NA	NA	NA	NA	NA	NA	NA	NA	NA	NA	2	8	25	4	8	50	1	8	12.5	58.5(50~62)	NA	NA	8	NA	NA	NA	8	2	0	6	0	NA	NA	NA	8	2	3	0	0	0
8	21932386	50	20	40	NA	NA	NA	2	20	10	NA	NA	NA	NA	NA	NA	2	20	10	2	20	10	NA	NA	NA	NA	NA	NA	62(41~81)	25	25	0	0	15	35	0	15	15	20	0	NA	NA	NA	50	NA	NA	NA	NA	NA
13	24526137	7	7	100	1	7	14.2857	0	7	0	NA	NA	NA	NA	NA	NA	NA	NA	NA	0	7	0	1	7	14.2857	3	7	42.8571	61(NA)	4	3	0	NA	NA	NA	7	NA	NA	NA	7	NA	NA	NA	7	5	0	0	0	0
14	25640025	794	368	46.3476	NA	NA	NA	70	298	23.4899	8	222	3.6036	NA	NA	NA	54	228	23.6842	29	243	11.9342	110	212	51.8868	118	241	48.9627	58(26~86)	502	292	0	45	83	666	0	106	216	251	221	NA	NA	NA	794	374	191	20	0	4
17	25984534	259	134	51.7375	NA	NA	NA	16	134	11.9403	5	134	3.73134	NA	NA	NA	28	134	20.8955	17	134	12.6866	43	134	32.0896	60	134	44.7761	NA	NA	NA	259	NA	NA	NA	259	NA	NA	NA	259	NA	NA	NA	259	NA	NA	NA	NA	NA
20	28770558	70	66	94.2857	NA	NA	NA	13	63	20.6349	0	NA	NA	NA	NA	NA	18	58	31.0345	6	46	13.0435	NA	NA	NA	35	55	63.6364	NA	32	38	0	12	15	33	10	16	31	15	8	NA	NA	NA	70	41	17	2	0	2
22	31221778	2065	1528	73.9952	NA	NA	NA	219	1528	14.3325	69	1528	4.51571	NA	NA	NA	NA	NA	NA	220	1528	14.3979	NA	NA	NA	NA	NA	NA	69(61~74)	NA	NA	2065	NA	NA	NA	2065	682	782	509	92	294	1132	173	466	NA	NA	NA	NA	NA
31	34726261	2092	570	27.2467	172	411	41.8491	85	434	19.5853	20	320	6.25	NA	NA	NA	53	338	15.6805	61	423	14.4208	197	446	44.1704	242	501	48.3034	NA	1078	1014	0	374	429	1267	22	613	597	665	217	NA	NA	NA	2092	1274	439	NA	NA	NA
32	35248783	160	160	100	NA	NA	NA	4	160	2.5	2	160	1.25	NA	NA	NA	11	160	6.875	9	160	5.625	22	160	13.75	39	160	24.375	60(32~85)	103	57	0	15	20	125	0	51	34	75	0	NA	NA	NA	160	63	36	4	0	0
37	37568580	8	8	100	NA	NA	NA	1	8	12.5	1	8	12.5	NA	NA	NA	1	8	12.5	3	8	37.5	3	8	37.5	1	8	12.5	65(49~72)	6	2	0	NA	NA	NA	8	NA	NA	NA	8	NA	NA	NA	8	NA	NA	NA	NA	NA
41	38845015	267	242	90.6367	NA	NA	NA	29	242	14	9	242	4	NA	NA	NA	NA	NA	NA	58	242	24	107	242	45	NA	NA	NA	66 (59–71)	156	111	0	NA	NA	NA	267	NA	NA	NA	267	NA	NA	42	225	NA	NA	NA	NA	NA
Total		6052	3250	53.7013	178	432	41.2037	460	3029	15.1865	126	2715	4.64088	NA	NA	NA	167	946	17.6533	427	2945	14.4992	523	1320	39.6212	522	1151	45.3519	NA(26~86)	1960	1589	2503	446	563	2138	2905	1512	1713	1576	1251	294	1132	215	4411	1772	689	28	0	6
%																														32.386	26.2558	41.3582	7.36946	9.30271	35.3272	48.0007	24.9835	28.3047	26.041	20.6709	4.8579	18.7046	3.55254	72.885	29.2796	11.3847	0.462657	0	0.0991408
[truncated: 4 more columns]
