# Supplementary material for: A Comprehensive Analysis of Bone Marrow-Derived Cytogenetic Abnormalities in Multiple Myeloma Patients with Extramedullary Disease
Source: Research Square preprint supplement (doi:10.21203/rs.3.rs-6188588/v1), 2025-04-30
Supplement: Supplementary file 5 [file 82b29a67a1d13f93632042ea.xlsx]

## Sheet: Sheet1
Supplementary Table 1. Summary of Eligible Studies and Patients
ID	PMID	Year	First author	Nation	Center	MM patients		Median age (range)	Gender			Cytogenetics available		Without EMD	With EMD		Occurence of EMD			Type of EMD			EMD location		Cytogenetic Method
						consecutively screened	included		Male	Female	NA	n	%		n	Incidence	Pimary	Secondary	NA	only EM-B	EM-E with or w/o EM-B	NA	CNS involved	with sPCL
Prospective study
1	24038024	2014	Pour, L.	Czech Republic	1	226	226	60.8(27.9~83.5)	115	111	0	51	22.5664	171	55	24.3363	0	55	0	23	32	0	2	0	FISH
2	33512480	2021	Wang, D.	China	1	NA	18	53.5(38~66)	10	8	0	18	100	13	5	NA	NA	NA	5	NA	NA	5	NA	1	FISH/Karyotype
3	34314018	2021	Lonial, S.	USA	Multiple(58)	293	97	65.0(60~70)	51	46	0	97	100	75	22	7.50853	NA	NA	22	NA	NA	22	NA	NA	FISH
4	34421924	2021	Deng, H.	China	1	NA	20	57.5(38~77)	12	8	0	20	100	13	7	NA	0	7	0	0	7	0	NA	NA	Not Specified
5	34980210	2022	Tang, Y.	China	1	NA	16	58.5(48~78)	NA	NA	16	16	100	8	8	NA	NA	NA	8	NA	NA	8	NA	NA	FISH
6	36274163	2022	Byun, J. M.	Korea	Multiple(6)	NA	32	56(34~71)	22	10	0	23	71.875	0	32	NA	18	14	0	9	23	0	2	0	FISH/Karyotype
7	39558020	2024	Junjing, Y.	China	3	37	30	62 (55–81)	5	5	0	10	33.3333	0	10	33.33	0	10	0	5	5	0	1	0	FISH
Retrospective study
8	21932386	2012	Gozzetti, A.	Italy	Multiple(16)	NA	100	NA	49	51	0	39	39	50	50	NA	18	32	0	0	50	0	50	0	FISH/Karyotype
9	22286070	2012	Rasche, L.	Germany	1	357	24	56(41~79)	15	9	0	19	79.1667	0	24	6.72269	0	24	0	NA	24	0	5	0	Not Specified
10	23000906	2013	Comfere, N. I.	USA	1	NA	5	56(46~70)	3	2	0	5	100	0	5	NA	0	5	0	0	5	0	0	0	FISH
11	23368088	2013	Billecke, L.	Germany	Multiple	NA	30	68(41~81)	19	10	1	17	56.6667	0	30	NA	8	21	1	11	19	0	1	1	FISH
12	24395149	2015	Zhang, J.	China	1	256	36	58.6(31~78)	23	13	0	8	22.2222	0	36	14.0625	20	16	0	0	36	0	36	0	Not Specified
13	24526137	2014	Rasche, L.	Germany	1	NA	18	NA	13	5	0	18	100	7	11	NA	3	8	0	0	11	0	1	0	Not Specified
14	25640025	2015	Deng, S.	China	1	834	834	58(26~86)	530	304	0	387	46.4029	794	40	4.79616	40	0	0	0	40	0	5	0	FISH
15	25812994	2015	Shin, H. J.	South Korea	Multiple(3)	290	58	53(34~66)	34	24	0	58	100	0	58	20	NA	NA	58	38	20	0	0	0	FISH
16	25833301	2015	Weinstock, M.	USA	1	663	55	52(34~66)	35	20	0	29	52.7273	0	55	8.29563	13	42	0	0	55	0	3	0	Not Specified
17	25984534	2015	Qu, X.	China	1	300	300	NA	NA	NA	300	175	58.3333	259	41	13.6667	27	14	0	8	33	0	4	0	FISH
18	26432667	2016	Besse, L.	Czech Republic	2	NA	31	64(44-82)	17	14	0	25	80.6452	0	31	NA	2	29	0	15	16	0	0	0	FISH
19	27206246	2016	de Haart, S. J.	Netherlands	1	NA	14	50.5(30~69)	9	5	0	9	64.2857	0	14	NA	2	12	0	0	14	0	NA	NA	FISH/Karyotype
20	28770558	2017	Handa, H.	Japan	1	NA	114	NA	61	53	0	114	100	70	44	NA	30	14	0	NA	NA	44	NA	NA	Not Specified
21	30719772	2019	Jiménez-Segura, R.	Spain	Multiple(9)	NA	21	61(NA)	13	8	0	11	52.381	0	21	NA	0	21	0	8	13	0	0	0	Not Specified
22	31221778	2020	Montefusco, V.	Italy	Multiple	2332	2332	NA	NA	NA	2332	1694	72.6415	2065	267	11.4494	267	0	0	243	12	12	NA	NA	FISH
23	31278209	2020	Beksac, M.	Europe	Multiple(19)	NA	226	62(34~87)	NA	NA	226	111	49.115	0	226	NA	130	96	0	50	176	0	14	0	FISH
24	31288095	2019	Gagelmann, N.	Europe	Multiple	NA	488	59(25~77)	287	201	0	488	100	0	488	NA	488	0	0	374	114	0	NA	NA	Not Specified
25	31334859	2019	Avivi, I.	Europe	Multiple(15)	NA	127	63(27~94)	76	51	0	88	69.2913	0	127	NA	20	107	0	0	127	0	14	5	FISH
26	32118627	2020	Liu, Y.	USA	2	NA	10	65(48~76)	6	4	0	5	50	0	10	NA	4	6	0	0	0	10	0	0	FISH
27	32191818	2020	Long, X.	China	1	NA	8	56(31~65)	4	4	0	7	87.5	0	8	NA	NA	NA	8	0	8	0	0	1	Not Specified
28	33686665	2021	Claudel, A.	France	1	NA	13	62(52~72)	NA	NA	13	11	84.6154	0	13	NA	3	10	0	0	13	0	13	NA	FISH/Karyotype
29	33792474	2021	Huynh, T.	France	1	NA	43	57(47.5~65)	25	18	0	33	76.7442	0	43	NA	NA	NA	43	0	43	0	10	2	Not Specified
30	34268123	2021	Xu, J.	China	1	NA	17	63(44~74)	12	5	0	8	47.0588	0	17	NA	13	4	0	10	7	0	0	0	FISH/Karyotype
31	34726261	2022	Stork, M.	Czech Republic	Multiple	4985	2326	NA	1211	1115	0	629	27.0421	2092	234	4.69408	0	234	0	143	71	20	NA	NA	FISH
32	35248783	2022	Gao, S.	China	1	425	226	61(26~85)	144	82	0	226	100	160	66	15.5294	66	0	0	43	23	0	0	0	FISH
33	36697375	2023	Tucker, S. M.	USA	1	315	315	69(37~94)	192	123	0	272	86.3492	307	8	2.53968	1	7	0	0	8	0	3	0	FISH
34	37304491	2023	Zhao, W.	China	1	NA	12	55(47~68)	7	5	0	12	100	7	5	NA	5	0	0	0	5	0	1	0	FISH
35	37421603	2023	Zanwar, S.	USA	1	NA	299	59.7(18-89.3)	NA	NA	299	236	78.9298	0	299	NA	95	204	0	0	299	0	NA	NA	FISH
36	37479009	2023	Ji, J.	China	1	NA	35	56(43~75)	23	12	0	25	71.4286	0	35	NA	0	35	0	11	24	0	NA	NA	FISH/Karyotype
37	37568580	2023	Dunphy, K.	Finland	Multiple	NA	17	65(49~72)	12	5	0	17	100	8	9	NA	6	3	0	0	9	0	NA	NA	Not Specified
38	37941401	2024	Notarfranchi, L.	Italy	1	NA	22	67(47~76)	13	9	0	18	81.8182	0	22	NA	3	19	0	0	22	0	NA	2	FISH
39	38206369	2024	Gao, S.	China	1	647	107	63(38~89)	72	35	0	92	85.9813	0	107	16.5379	107	0	0	79	28	0	0	0	FISH
40	39695462	2024	Dong, L.	China	2	371	371	NA	224	147	0	371	100	0	371	NA	371	0	0	258	153	0	NA	NA	FISH
41	38845015	2024	Saurabh,Z.	USA	11	351	351	NA	202	149	0	316	90.0285	267	84	NA	NA	NA	84	NA	NA	84	NA	NA	Not Specified
Total						NA	9424	NA(25~94)	3546	2671	3187	5808	61.6299	6366	3038	NA	1760	1049	229	1328	1545	205	165	12	NA
