# Supplementary material for: A Comprehensive Analysis of Bone Marrow-Derived Cytogenetic Abnormalities in Multiple Myeloma Patients with Extramedullary Disease
Source: Research Square preprint supplement (doi:10.21203/rs.3.rs-6188588/v1), 2025-04-30
Supplement: Supplementary file 6 [file 9ff6fb7d4e1f7df0a9ee4bdb.xlsx]

## Sheet: Sheet1
Supplementary Table 2. Baseline Clinical Characteristics of 3038 EMD Patients Across 38 Studies
ID	PMID	N	Median age (range)	Gender			DS stage				ISS stage				R-ISS stage				M protein
				Male	Female	NA	I	II	III	NA	I	II	III	NA	I	II	III	NA	IgG	IgA	IgD	IgE	IgM	LC only	non-secretory	KAP	LAM
1	24038024	55	NA	NA	NA	55	NA	NA	NA	55	NA	NA	NA	55	NA	NA	NA	55	NA	NA	NA	NA	NA	NA	NA	NA	NA
2	33512480	5	54(38~62)	2	3	0	0	0	5	0	2	3	0	0	NA	NA	NA	5	3	0	0	0	0	2	0	3	2
3	34314018	22	58.5(40~73)	13	9	0	NA	NA	NA	22	3	6	13	0	NA	NA	NA	22	NA	NA	NA	NA	NA	NA	NA	NA	NA
4	34421924	7	58(38~73)	4	3	0	NA	NA	NA	7	0	4	3	0	NA	NA	NA	7	3	0	1	0	0	3	0	5	2
5	34980210	8	60(48~78)	NA	NA	8	NA	NA	NA	8	0	1	7	0	NA	NA	NA	8	4	3	0	0	0	1	0	3	5
6	36274163	32	56(34~71)	22	10	0	NA	NA	NA	32	7	14	11	0	3	7	13	9	NA	NA	NA	NA	NA	NA	NA	NA	NA
7	39558020	10	62 (55–81)	5	5	0	NA	NA	NA	10	NA	NA	NA	10	1	7	2	0	5	1	1	0	0	3	0	NA	NA
8	21932386	50	64(39~82)	24	26	0	3	12	25	10	18	13	9	10	NA	NA	NA	50	NA	NA	NA	NA	NA	NA	NA	NA	NA
9	22286070	24	56(41~79)	15	9	0	3	3	18	0	0	0	0	24	NA	NA	NA	24	14	3	1	0	0	5	1	NA	NA
10	23000906	5	56(46~70)	3	2	0	NA	NA	NA	5	NA	NA	NA	5	NA	NA	NA	5	NA	NA	NA	NA	NA	NA	1	2	2
11	23368088	30	68(41~81)	19	10	1	1	1	25	3	NA	NA	NA	30	NA	NA	NA	30	12	5	2	0	2	5	0	18	8
12	24395149	36	58.6(31~78)	23	13	0	NA	NA	NA	36	3	15	18	0	NA	NA	NA	36	15	6	0	0	0	15	0	NA	NA
13	24526137	11	59(NA)	9	2	0	NA	NA	NA	11	0	0	0	11	NA	NA	NA	11	5	6	0	0	0	0	0	NA	NA
14	25640025	40	58(26~73)	28	12	0	1	2	37	0	10	8	13	9	NA	NA	NA	40	19	6	3	0	0	7	2	20	18
15	25812994	58	53(34~66)	34	24	0	7	14	37	0	24	17	16	1	NA	NA	NA	58	24	9	2	0	1	17	5	19	33
16	25833301	55	52(34~66)	35	20	0	NA	NA	NA	55	NA	NA	NA	55	NA	NA	NA	55	NA	NA	NA	NA	NA	NA	NA	NA	NA
17	25984534	41	58(39~78)	27	14	0	1	3	37	0	14	15	12	0	NA	NA	NA	41	21	12	0	0	1	7	0	NA	NA
18	26432667	31	64(44~82)	17	14	0	0	1	30	0	14	5	11	1	NA	NA	NA	31	18	9	1	0	0	2	1	NA	NA
19	27206246	14	50.5(30~69)	9	5	0	NA	NA	NA	14	NA	NA	NA	14	NA	NA	NA	14	9	2	0	0	0	3	0	7	4
20	28770558	44	NA	29	15	0	5	7	27	5	9	19	13	3	NA	NA	NA	44	29	6	0	0	1	7	1	26	17
21	30719772	21	61(NA)	13	8	0	NA	NA	NA	21	NA	NA	NA	21	NA	NA	NA	21	NA	NA	NA	NA	NA	NA	NA	NA	NA
22	31221778	267	68(60~74)	NA	NA	267	NA	NA	NA	267	119	85	38	25	38	125	17	87	NA	NA	NA	NA	NA	NA	NA	NA	NA
23	31278209	226	62(34~87)	NA	NA	226	NA	NA	NA	226	76	68	76	6	NA	NA	NA	226	NA	NA	NA	NA	NA	NA	NA	NA	NA
24	31288095	488	59(25~77)	287	201	0	NA	NA	NA	488	152	140	124	72	NA	NA	NA	488	231	106	NA	NA	NA	120	23	NA	NA
25	31334859	127	63(27~94)	76	51	0	NA	NA	NA	127	35	31	51	10	NA	NA	NA	127	59	31	1	0	0	29	7	69	50
26	32118627	10	65(48~76)	6	4	0	NA	NA	NA	10	NA	NA	NA	10	NA	NA	NA	10	NA	NA	NA	NA	NA	NA	NA	NA	NA
27	32191818	8	56(31~65)	4	4	0	NA	NA	NA	8	4	3	1	0	NA	NA	NA	8	2	3	1	0	0	1	1	2	4
28	33686665	13	62(52~72)	NA	NA	13	NA	NA	NA	13	0	6	4	3	NA	NA	NA	13	NA	NA	NA	NA	NA	NA	NA	NA	NA
29	33792474	43	57(47.5~65)	25	18	0	NA	NA	NA	43	9	9	21	4	NA	NA	NA	43	23	5	2	0	0	13	0	NA	NA
30	34268123	17	63(44~74)	12	5	0	NA	NA	NA	17	NA	NA	NA	17	NA	NA	NA	17	10	5	1	0	0	1	0	10	7
31	34726261	234	NA	133	101	0	23	45	162	4	81	67	57	29	NA	NA	NA	234	123	65	NA	NA	NA	31	9	132	91
32	35248783	66	64.5(26~81)	41	25	0	6	6	54	0	26	17	23	0	NA	NA	NA	66	34	11	1	0	0	19	1	31	35
33	36697375	8	71(46~84)	7	1	0	NA	NA	NA	8	NA	NA	NA	8	NA	NA	NA	8	4	1	1	0	0	2	0	6	2
34	37304491	5	54(49~63)	3	2	0	0	2	3	0	0	1	4	0	0	1	4	0	3	2	0	0	0	0	0	0	5
35	37421603	299	59.7(18-89.3)	NA	NA	299	NA	NA	NA	299	104	62	65	68	61	74	76	88	152	72	4	0	0	70	1	182	117
36	37479009	35	56(43~75)	23	12	0	8		27	0	19		16	0	25		8	2	13	11	2	0	0	9	0	NA	NA
37	37568580	9	65(49~72)	6	3	0	NA	NA	NA	9	NA	NA	NA	9	NA	NA	NA	9	NA	NA	NA	NA	NA	NA	NA	NA	NA
38	37941401	22	67(47~76)	13	9	0	NA	NA	NA	22	6	6	10	0	NA	NA	NA	22	6	7	0	0	0	9	0	10	12
39	38206369	107	63(38~89)	72	35	0	7	22	78	0	32	33	42	0	21	39	32	15	55	18	2	0	0	28	4	48	55
40	39695462	371	NA	224	147	0	NA	NA	NA	371	99	109	154	9	85	215	52	19	154	80	23	NA	NA	75	37	NA	NA
41	38845015	84	62 (55–69)	46	38	0	NA	NA	NA	84	NA	NA	NA	84	NA	NA	11	73	NA	NA	NA	NA	NA	NA	NA	NA	NA
Total	n	3038	NA(25~94)	1309	860	869	183		565	2290	1623		812	603	702		215	2121	1050	485	49	0	5	484	94	593	469
	%			43.0876	28.3081	28.6043	6.0237	0	18.5978	75.3785	53.4233	0	26.7281	19.8486	23.1073	0	7.07702	69.8157	34.5622	15.9645	1.6129	0	0.164582	15.9315	3.09414	19.5194	15.4378
