# Supplementary material for: A Comprehensive Analysis of Bone Marrow-Derived Cytogenetic Abnormalities in Multiple Myeloma Patients with Extramedullary Disease
Source: Research Square preprint supplement (doi:10.21203/rs.3.rs-6188588/v1), 2025-04-30
Supplement: Supplementary file 7 [file e454ab0a94bb162bc38f5066.xlsx]

## Sheet: Sheet1
Supplementary Table 8. Clinical and Cytogenetic Characteristics of Patients With EM-E vs. Without EMD From 6 Comparative Studies
ID	PMID	N	Cytogenetics available		Hyperdiploidy			t(4;14)			t(14;16)			t(14;20)			t(11;14)			del(17p)/del p53			1q21+			del RB1/del13q			Median age (range)	Gender			DS stage				ISS stage				R-ISS stage				M protein
			n	%	n	available	%	n	available	%	n	avilable	%	n	avilable	%	n	avilable	%	n	avilable	%	n	avilable	%	n	avilable	%		Male	Female	NA	I	II	III	NA	I	II	III	NA	I	II	III	NA	IgG	IgA	IgD	IgE	IgM
Patients with EMD-E
4	34421924	7	7	100	NA	NA	NA	2	20	10	2	7	28.5714	NA	NA	NA	NA	NA	NA	2	7	28.5714	NA	NA	NA	NA	NA	NA	58(38~73)	4	3	0	NA	NA	NA	7	0	4	3	0	NA	NA	NA	7	3	0	1	0	0
8	21932386	50	19	38	NA	NA	NA	2	19	10.5263	NA	NA	NA	NA	NA	NA	2	19	10.5263	1	19	5.26316	NA	NA	NA	NA	NA	NA	64(39~82)	24	26	0	3	12	25	10	18	13	9	10	NA	NA	NA	50	NA	NA	NA	NA	NA
13	24526137	11	11	100	2	11	18.1818	1	11	9.09091	NA	NA	NA	NA	NA	NA	NA	NA	NA	1	11	9.09091	2	11	18.1818	9	11	81.8182	59(NA)	9	2	0	0	0	0	11	0	0	0	11	0	0	0	11	5	6	0	0	0
14	25640025	40	19	47.5	NA	NA	NA	7	31	22.5806	2	26	7.69231	NA	NA	NA	4	28	14.2857	10	29	34.4828	14	26	53.8462	17	29	58.6207	58(26~73)	28	12	0	1	2	37	0	10	8	13	9	NA	NA	NA	40	19	6	3	0	0
17	25984534	14	8	57.1429	NA	NA	NA	0	8	0	0	8	0	NA	NA	NA	0	8	0	3	8	37.5	4	8	50	4	8	50	58(39~78)	11	3	0	0	0	14	0	4	5	5	0	NA	NA	NA	14	5	6	0	0	1
37	37568580	9	9	100	NA	NA	NA	1	9	11.1111	2	9	22.2222	NA	NA	NA	1	9	11.1111	1	9	11.1111	5	9	55.5556	1	9	11.1111	65(49~72)	6	3	0	NA	NA	NA	9	NA	NA	NA	9	NA	NA	NA	9	NA	NA	NA	NA	NA
Total		131	73	55.7252	2	11	18.1818	13	98	13.2653	6	50	12	NA	NA	NA	7	64	10.9375	18	83	21.6867	25	54	46.2963	31	57	54.386	NA(26~82)	82	49	0	4	14	76	37	32	30	30	39	0	0	0	131	32	18	4	0	1
%																														62.5954	37.4046	0	3.05344	10.687	58.0153	28.2443	24.4275	22.9008	22.9008	29.771	0	0	0	100	24.4275	13.7405	3.05344	0	0.763359
Patients without EMD
4	34421924	13	13	100	NA	NA	NA	1	21	4.7619	5	13	38.4615	NA	NA	NA	NA	NA	NA	2	13	15.3846	NA	NA	NA	NA	NA	NA	58(42-77)	8	5	0	NA	NA	NA	13	1	6	6	0	NA	NA	NA	13	8	2	1	0	0
8	21932386	50	20	40	NA	NA	NA	2	20	10	NA	NA	NA	NA	NA	NA	2	20	10	2	20	10	NA	NA	NA	NA	NA	NA	62(41~81)	25	25	0	0	15	35	0	15	15	20	0	NA	NA	NA	50	NA	NA	NA	NA	NA
13	24526137	7	7	100	1	7	14.2857	0	7	0	NA	NA	NA	NA	NA	NA	NA	NA	NA	0	7	0	1	7	14.2857	3	7	42.8571	61(NA)	4	3	0	0	0	0	7	0	0	0	7	0	0	0	7	5	0	0	0	0
14	25640025	794	368	46.3476	NA	NA	NA	70	298	23.4899	8	222	3.6036	NA	NA	NA	54	228	23.6842	29	243	11.9342	110	212	51.8868	118	241	48.9627	58(26-86)	502	292	0	45	83	666	0	106	216	251	221	NA	NA	NA	794	374	191	20	0	4
17	25984534	259	134	51.7375	NA	NA	NA	16	134	11.9403	5	134	3.73134	NA	NA	NA	28	134	20.8955	17	134	12.6866	43	134	32.0896	60	134	44.7761	NA	NA	NA	259	NA	NA	NA	259	NA	NA	NA	259	NA	NA	NA	259	NA	NA	NA	NA	NA
37	37568580	8	8	100	NA	NA	NA	1	8	12.5	1	8	12.5	NA	NA	NA	1	8	12.5	3	8	37.5	3	8	37.5	1	8	12.5	65(49~72)	6	2	0	NA	NA	NA	8	NA	NA	NA	8	NA	NA	NA	8	NA	NA	NA	NA	NA
Total		1131	550	48.6295	1	7	14.2857	90	488	18.4426	19	377	5.03979	NA	NA	NA	85	390	21.7949	53	425	12.4706	157	361	43.4903	182	390	46.6667	NA(26~86)	545	327	259	45	98	701	287	122	237	277	495	0	0	0	1131	387	193	21	0	4
																														48.1874	28.9125	22.9001	3.97878	8.6649	61.9805	25.3758	10.7869	20.9549	24.4916	43.7666	0	0	0	100	34.2175	17.0645	1.85676	0	0.353669
[truncated: 7 more columns]
