# Supplementary material for: A Comprehensive Analysis of Bone Marrow-Derived Cytogenetic Abnormalities in Multiple Myeloma Patients with Extramedullary Disease
Source: Research Square preprint supplement (doi:10.21203/rs.3.rs-6188588/v1), 2025-04-30
Supplement: Supplementary file 8 [file f47c1e5ab3a4a65e74d250e5.xlsx]

## Sheet: Sheet1
supplementary Table 4. Cytogenetic Characteristics of EMD-MM Patients Across 41 Studies
ID	PMID	N	Cytogenetics available		Hyperdiploidy			t(4;14)			t(14;16)			t(14;20)			t(11;14)			del(17p)/del p53			1q21+			del RB1/del13q
			n	%	n	available	%	n	available	%	n	available	%	n	available	%	n	available	%	n	available	%	n	available	%	n	available	%
1	24038024	55	13	23.6364	0	4	0	4	12	33.3333	NA	NA	NA	NA	NA	NA	NA	NA	NA	2	6	33.3333	5	9	55.5556	7	13	53.8462
2	33512480	5	5	100	NA	NA	NA	2	5	40	0	5	0	NA	NA	NA	NA	NA	NA	1	5	20	NA	NA	NA	NA	NA	NA
3	34314018	22	22	100	NA	NA	NA	0	22	0	0	22	0	NA	NA	NA	NA	NA	NA	3	22	13.6364	3	22	13.6364	NA	NA	NA
4	34421924	7	7	100	NA	NA	NA	2	20	10	2	7	28.5714	NA	NA	NA	NA	NA	NA	2	7	28.5714	NA	NA	NA	NA	NA	NA
5	34980210	8	8	100	NA	NA	NA	NA	24	NA	NA	NA	NA	NA	NA	NA	NA	NA	NA	1	8	12.5	6	8	75	0	8	0
6	36274163	32	23	71.875	NA	NA	NA	6	23	26.087	6	23	26.087	NA	NA	NA	NA	NA	NA	4	23	17.3913	NA	NA	NA	NA	NA	NA
7	39558020	10	10	100	0	10	0	0	10	0	0	10	0	0	10	0	0	10	0	1	10	10	3	10	30	1	10	10
8	21932386	50	19	38	NA	NA	NA	2	19	10.5263	NA	NA	NA	NA	NA	NA	2	19	10.5263	1	19	5.26316	NA	NA	NA	NA	NA	NA
9	22286070	24	19	79.1667	NA	NA	NA	10	19	52.6316	NA	NA	NA	NA	NA	NA	NA	NA	NA	4	19	21.0526	NA	NA	NA	11	19	57.8947
10	23000906	5	5	100	3	5	60	0	5	0	2	5	40	NA	NA	NA	0	5	0	1	5	20	NA	NA	NA	3	5	60
11	23368088	30	17	56.6667	1	17	5.88235	1	17	5.88235	NA	NA	NA	NA	NA	NA	1	17	5.88235	2	17	11.7647	NA	NA	NA	4	17	23.5294
12	24395149	36	8	22.2222	0	8	0	0	8	0	0	8	0	0	8	0	0	8	0	0	8	0	0	8	0	1	8	12.5
13	24526137	11	11	100	2	11	18.1818	1	11	9.09091	NA	NA	NA	NA	NA	NA	NA	NA	NA	1	11	9.09091	2	11	18.1818	9	11	81.8182
14	25640025	40	31	77.5	NA	NA	NA	7	31	22.5806	2	26	7.69231	NA	NA	NA	4	28	14.2857	10	29	34.4828	14	26	53.8462	17	29	58.6207
15	25812994	58	58	100	NA	NA	NA	3	48	6.25	0	39	0	NA	NA	NA	7	47	14.8936	0	54	0	12	28	42.8571	10	39	25.641
16	25833301	55	29	52.7273	NA	NA	NA	NA	NA	NA	NA	NA	NA	NA	NA	NA	2	29	6.89655	1	29	3.44828	1	29	3.44828	9	29	31.0345
17	25984534	41	29	70.7317	NA	NA	NA	4	29	13.7931	0	29	0	NA	NA	NA	0	29	0	9	29	31.0345	16	29	55.1724	16	29	55.1724
18	26432667	31	25	80.6452	15	25	60	4	13	30.7692	0	NA	NA	NA	NA	NA	NA	NA	NA	4	25	16	16	25	64	12	25	48
19	27206246	14	9	64.2857	4	7	57.1429	NA	NA	NA	NA	NA	NA	NA	NA	NA	NA	NA	NA	NA	NA	NA	3	8	37.5	1	8	12.5
20	28770558	44	40	90.9091	NA	NA	NA	8	41	19.5122	1	18	5.55556	NA	NA	NA	8	37	21.6216	14	35	40	NA	NA	NA	27	36	75
21	30719772	21	11	52.381	NA	NA	NA	1	11	9.09091	0	11	0	NA	NA	NA	NA	NA	NA	2	11	18.1818	NA	NA	NA	NA	NA	NA
22	31221778	267	166	62.1723	NA	NA	NA	22	166	13.253	6	166	3.61446	NA	NA	NA	NA	NA	NA	32	166	19.2771	NA	NA	NA	NA	NA	NA
23	31278209	226	111	49.115	NA	NA	NA	8	111	7.20721	2	111	1.8018	NA	NA	NA	4	111	3.6036	10	111	9.00901	NA	NA	NA	20	111	18.018
24	31288095	488	488	100	NA	NA	NA	90	488	18.4426	13	488	2.66393	6	488	1.22951	NA	NA	NA	81	488	16.5984	50	488	10.2459	NA	NA	NA
25	31334859	127	88	69.2913	NA	NA	NA	17	88	19.3182	2	88	2.27273	0	88	0	6	88	6.81818	10	88	11.3636	NA	NA	NA	28	88	31.8182
26	32118627	10	5	50	NA	NA	NA	0	5	0	1	5	20	0	5	0	0	5	0	0	5	0	4	5	80	2	5	40
27	32191818	8	7	87.5	NA	NA	NA	1	17	5.88235	NA	NA	NA	NA	NA	NA	NA	NA	NA	1	7	14.2857	7	7	100	4	7	57.1429
28	33686665	13	11	84.6154	NA	NA	NA	3	11	27.2727	1	11	9.09091	1	11	9.09091	0	11	0	1	11	9.09091	2	11	18.1818	0	11	0
29	33792474	43	33	76.7442	NA	NA	NA	4	33	12.1212	NA	NA	NA	NA	NA	NA	3	33	9.09091	7	33	21.2121	NA	NA	NA	NA	NA	NA
30	34268123	17	8	47.0588	NA	NA	NA	NA	NA	NA	NA	NA	NA	NA	NA	NA	NA	NA	NA	0	8	0	3	8	37.5	4	8	50
31	34726261	234	59	25.2137	12	41	29.2683	15	47	31.9149	0	30	0	NA	NA	NA	6	32	18.75	3	42	7.14286	35	49	71.4286	43	55	78.1818
32	35248783	66	66	100	NA	NA	NA	5	66	7.57576	3	66	4.54545	NA	NA	NA	4	66	6.06061	6	66	9.09091	15	66	22.7273	15	66	22.7273
33	36697375	8	8	100	4	8	50	0	8	0	0	8	0	0	8	0	2	8	25	1	8	12.5	0	8	0	1	8	12.5
34	37304491	5	5	100	NA	NA	NA	2	5	40	0	5	0	0	5	0	0	5	0	2	5	40	0	5	0	0	5	0
35	37421603	299	236	78.9298	57	236	24.1525	38	236	16.1017	19	236	8.05085	5	236	2.11864	31	236	13.1356	38	236	16.1017	71	236	30.0847	69	236	29.2373
36	37479009	35	25	71.4286	NA	NA	NA	2	25	8	NA	NA	NA	NA	NA	NA	1	25	4	8	25	32	15	25	60	NA	NA	NA
37	37568580	9	9	100	NA	NA	NA	1	9	11.1111	2	9	22.2222	NA	NA	NA	1	9	11.1111	1	9	11.1111	5	9	55.5556	1	9	11.1111
38	37941401	22	18	81.8182	NA	NA	NA	2	18	11.1111	1	18	5.55556	1	18	5.55556	2	18	11.1111	2	18	11.1111	13	18	72.2222	10	18	55.5556
39	38206369	107	92	85.9813	NA	NA	NA	8	92	8.69565	6	92	6.52174	NA	NA	NA	12	92	13.0435	10	92	10.8696	22	92	23.913	18	92	19.5652
40	39695462	371	371	100	NA	NA	NA	27	371	7.7	8	371	2.15633	NA	NA	NA	39	371	10.5121	29	371	7.81671	141	371	38.0054	101	371	27.2237
41	38845015	84	73	86.9048	NA	NA	NA	5	73	7	1	73	1.4	NA	NA	NA	NA	NA	NA	16	73	21.9178	34	73	46.5753	NA	NA	NA
Total		3038	2278	74.9835	98	372	26.3441	305	2237	13.6343	78	1980	3.93939	13	877	1.48233	135	1339	10.0822	321	2234	14.3688	498	1684	29.5724	444	1376	32.2674
